# 1 **Assessing natural selection during range expansions: Insights from a spatially explicit ABC** 2 **study**

3 Ricardo Kanitz<sup>1,2,3\*</sup>, Samuel Neuenschwander<sup>1,4</sup>, Jérôme Goudet<sup>1,2</sup>

4  
5 <sup>1</sup>Department of Ecology & Evolution, University of Lausanne, Switzerland

6 <sup>2</sup>Swiss Institute of Bioinformatics, University of Lausanne, Switzerland

7 <sup>3</sup>Syngenta Crop Protection AG, Werk Rosental, Schwarzwaldallee 215, Basel, Switzerland

8 <sup>4</sup>Vital-IT, Swiss Institute of Bioinformatics, University of Lausanne, Switzerland

9 \*Correspondence to [ricardo.kanitz@gmail.com](mailto:ricardo.kanitz@gmail.com)

10

11 **Keywords:** range expansion, natural selection, allele surfing, simulations, approximate Bayesian  
12 computation.

13

## 14 **Abstract**

15 For at least 40 years now, evolutionary biologists have discussed the relative roles of natural selection  
16 and genetic drift in shaping the genetic composition of populations. Range expansions are of  
17 particular interest in this discussion: They normally occur over environmental gradients allowing  
18 local adaptation to take place, but the demographic properties of these expansions also potentiate  
19 genetic-drift effects, which may in turn randomly generate extreme changes in allele frequencies as  
20 populations expand in territory and numbers (i.e. allele surfing). Here, we address the detection and  
21 measurement of selection in such scenario using simulations. We mimic a range expansion over a  
22 variable selective gradient where individuals have in their genomes both loci that are neutral and loci  
23 determining a quantitative trait subject to selection. The responsiveness of summary statistics to the  
24 selective pressure is then assessed, and estimates of the selective pressure are made – based on these  
25 statistics – with approximate Bayesian computation (ABC). We observe that statistics related to  
26 isolation-by-distance patterns present a strong response to selection. This response can be used in  
27 ABC to estimate the strength of selection acting on the simulated populations with very reliable  
28 measures of estimability, regardless of the genetic architecture underlying the selected trait.  
29 Furthermore, these estimates are robust to noise produced by other genetic and demographic  
30 parameters such as heritability, mutation, migration and population-growth rates. This approach of  
31 taking into account the spatial dimension of differentiation in quantitative traits offers a promising  
32 avenue of investigation about the role of natural selection in range-expansion scenarios, with possible  
33 implementations in the study of natural cases, as well.

## 34 **Introduction**

35 The opposition between selectionism and neutralism is one of the most significant debates in  
36 evolutionary biology (Ewens 1977; Kimura 1984; Hey 1999; Nei 2005). Ultimately, the question  
37 relies on which kind of processes (neutral or selective) lead to the majority of patterns observed in  
38 nature. Even though reconciliatory ideas have been proposed (Wagner 2008), the dilemma regarding  
39 selection vs. neutrality still endures in different contexts of evolutionary biology (Nei et al. 2010).  
40 One evolutionary context that has drawn increasing attention from evolutionary biologists is the  
41 context of ‘range expansions’. Range expansions are a ubiquitous phenomenon in nature involved in  
42 processes such as biological invasions (Parmesan and Yohe 2003; Walther et al. 2009), adaptive  
43 radiations (Rundell and Price 2009), speciations (Thorpe 1984; Hewitt 1996), pest and disease  
44 outbreaks (Jepsen et al. 2008; Roth et al. 2010), and post-glacial recolonizations (Hewitt 1996).  
45 Contractions and recolonizations following glacial oscillations are immensely common in nature, not  
46 only in temperate areas, but in tropical and subtropical regions, as well (Colinvaux et al. 2000; Hewitt  
47 2000). Therefore, it is probably safe to say that range expansions are likely involved in the  
48 evolutionary history of most of the organisms on the planet.

49 In the *selection vs. neutrality* discussion, range expansions are particularly important because  
50 populations increasing their range tend to do so over environmental gradients, leaving room for  
51 selection to act, possibly leading to local adaptation (Hewitt 1996). When different forms are  
52 established across this gradient, a *cline* is produced (Endler 1977). Clines have been thoroughly  
53 studied in the context of hybrid zones, where two allopatric populations get into secondary contact  
54 forming a tension zone in which the hybrids are selected against, so that the width of the cline is  
55 inversely proportional to the strength of selection (Barton and Hewitt 1985). The same rationale was  
56 later applied to clines appearing in ecological transition zones (i.e. ecotones): Mullen and Hoekstra  
57 (2008), in what has become a classical example, demonstrated that strong selection maintains two  
58 color-morphs of deer mice separated in two different habitats. These studies, however, have  
59 concentrated on small geographical scale clines. When it comes to large-scale clines (such as those  
60 appearing across continents) the literature is relatively scarcer with some theoretical studies focused  
61 on gene frequencies (Bazykin 1969; Endler 1977) and quantitative traits (Barton 1999; Leimar et al.  
62 2008), and other empirical studies mostly dedicated to the description of clinal patterns in organisms  
63 like *Drosophila* spp. (Hallas et al. 2002; Weeks et al. 2002), *Populus tremula* (Ingvarsson et al. 2006),  
64 *Quercus petraea* (Zanetto and Kremer 1995), *Pinus sylvestris* (García-Gil et al. 2003), *Arabidopsis*  
65 *thaliana* (Kronholm et al. 2012), and yet other plant species (Savolainen et al. 2007). However, no  
66 attempt to measure selection in any of these or any other large-scale systems has been carried out, to  
67 our knowledge.

68 Still in the context of expanding populations, Edmonds *et al.* (2004) proposed that the  
69 formation of (genotypic) allele-frequency clines across environmental gradients could also (and  
70 mainly) be caused by a purely neutral process during range expansion: the allele-surfing phenomenon,  
71 further studied and named by Klopstein *et al.* (2006). In populations undergoing a range expansion,  
72 mutations arising at the front of the wave of expansion can “surf” on this wave and increase in  
73 frequency simply due to a series of founder events. This surfing leaves behind a pronounced cline in  
74 allele frequencies, which may in turn have an effect on phenotype, generating a phenotypic cline.  
75 Recent studies are bringing a growing body of evidence that allele surfing alone is capable of  
76 producing many of the allele-frequency clines observed in natural populations (Currat *et al.* 2006;  
77 Excoffier and Ray 2008; Hofer *et al.* 2009). Some more recent findings even show that range  
78 expansions might allow for the accumulation of deleterious mutations generating an ‘expansion load’  
79 in populations of recently colonized areas (Peischl *et al.* 2013; Peischl and Excoffier 2015; Gilbert *et al.*  
80 *et al.* 2017).

81 Expansion load has been demonstrated to have a complex interaction with the adaptation  
82 dynamics of an expanding population. The existence of an environmental gradient can reduce the  
83 accumulated genetic load during the expansion process, while the consequent maladaptation in the  
84 front-end of expansion may in fact reduce the speed of the process (Gilbert *et al.* 2017). Moreover,  
85 the steepness and patchiness of the environmental gradient combined with different genetic  
86 architectures can have significant consequences on the outcome of the range expansion, as well. In  
87 fact, if the gradient is too steep and the genetic architecture relying on large-effect alleles, the range  
88 expansion might fail altogether (Gilbert and Whitlock 2017).

89 The focus of this work is not on expansion load, and rather on the adaptive processes possibly  
90 involved in range expansions. And there is indeed evidence that range expansions may foster adaptive  
91 processes, bringing about the idea of adaptive clines. For example, White *et al.* (2013) found  
92 indications of adaptive evolution in an ongoing range expansion in Irish bank voles, where several  
93 genes related to immune and behavioral systems were shown to form consistent clines across three  
94 independent transects of the expansion. Empirical evolutionary studies have also suggested that range  
95 expansion could facilitate adaptive change (Gralka *et al.* 2016). Furthermore, it appears that dispersal  
96 ability itself is a trait commonly affected by selection in range expansions: higher dispersal is often  
97 selected for in the margins of an expansion, as theoretical analyses suggest (Travis and Dytham 2002).  
98 Empirical support for this finding has been documented in several species (Hughes *et al.* 2007; Monty  
99 and Mahy 2010; Moreau *et al.* 2011). Furthermore, rapid adaptation to climate variation also  
100 facilitates range expansion, as has been verified in the invasive plant *Lythrum salicaria* in North  
101 America (Colautti and Barrett 2013). The body of evidence favoring selection in range-expansion

102 systems is substantial, and it often includes the examples of the (continental) large-scale clines  
103 mentioned above, as well (Bazykin 1969; Endler 1973; Barton 1999; Leimar et al. 2008). One  
104 particularly interesting case in large-scale cline and range expansion systems is the European barn  
105 owl (*Tyto alba*) and its coat-color cline (Antoniazza et al. 2010, 2014). In this species, a gradient of  
106 colors has established across Europe, probably during or after a post-glacial range expansion, with  
107 white morphs nearly fixed in the southwest and dark-brown morphs in the northeast. This and the  
108 above-mentioned cases all suggest selection has been acting. However, the current challenge persists  
109 in (i) distinguishing neutrality from selection and (ii) properly measuring the strength of natural  
110 selection in large-scale clinal systems involved in range expansions.

111         The question of whether or not one is able to assess selection in range expansions is still  
112 unsolved. Here, we take advantage of spatially explicit simulations to investigate the role of selection  
113 in the context of range expansions. First, we assess the ability of selection to leave a distinctive  
114 signature of its activity on the populations, despite the occurrence of the complicating demographic  
115 effects of range expansions (e.g. allele surfing). Second, with approximate Bayesian computation  
116 (ABC) (Beaumont et al. 2002), we address the detection and estimation of natural selection operating  
117 in this system. Finally, focused on the estimation of selection, we also explore the effect of other  
118 demographic and genetic parameters (nuisance parameters) on the accuracy of the selection estimates.  
119 Variations in these parameters may affect the probability of allele surfing. Therefore assessing the  
120 robustness of selection estimates across these parameters can bring valuable insight on the interplay  
121 between neutrality and natural selection in the ubiquitous demographic scenario of range expansions.

## 122 **Material & Methods**

123 *Range expansion* – Simulations were run in a rectangular world 5 patches wide and 51 (0-50) patches  
124 long (Fig. 1A) in an internal-development version of the program quantiNEMO2 (Neuenschwander  
125 et al. 2008a, 2018). To mimic a range expansion, only the left-most patches started the simulations  
126 occupied at their carrying capacity ( $K = 100$ ). These five patches evolved without any range  
127 expansion for arbitrary 100 generations in order to establish a background of genetic diversity,  
128 mimicking a refugium. The colonization of the remaining patches occurred after this initial phase and  
129 lasted 400 generations, at a speed that depended on the migration rate ( $m$ , uniform [0.1, 0.4]) and the  
130 intrinsic growth rate of each patch ( $r$ , uniform [0.2, 0.8]). We further varied narrow-sense heritability  
131 value ( $h^2$ , details below) and mutation rate ( $\mu$ , log-uniform [ $10^{-5}$ ,  $10^{-2}$ ]), which were used as  
132 “nuisance” parameters to test the robustness of the selection-related parameter’s estimates. As neutral  
133 genetic markers, ten multi-allelic loci were simulated with the same mutation rate implemented for  
134 the quantitative loci ( $\mu$ ) and a single-step mutation model, mimicking microsatellite markers.

135 *Selection implementation* – Fig. 1B illustrates how selection was implemented: we assumed  
136 a local hard stabilizing-selection scheme with a gradient of optima along the colonization path. On  
137 the left-hand side of the map, the selective optimum was defined at one extreme of the phenotypic  
138 range ( $Z_{OPT} = 0$ ); while, at the right-hand side, it was set to the other extreme ( $Z_{OPT} = 1$ ). Each patch  
139 along the colonization path had a different optimum value ( $Z_{OPT}$ ), linearly distributed between 0 and  
140 1. Individual fitness is given by the function:

$$141 \quad W_{ij} = e^{-\frac{(Z_{ij}-Z_{OPTj})^2}{2\omega^2}}$$

142 where  $W_{ij}$  is the fitness of individual  $i$  from patch  $j$  with phenotype  $Z_{ij}$ , where the patch optimum is  
143  $Z_{OPTj}$  and the selection intensity (identical for all patches) is given by  $\omega$ . This latter parameter  
144 determines the strength of selection in our model ( $\omega$ , log-uniform [0.1, 100], Fig. 2A). The  $\omega$   
145 parameter translates directly into a selection coefficient ( $s$ ) (Fig. 2B) according to equation:

$$146 \quad s = 1 - e^{-\frac{1}{2\omega^2}}$$

147 where  $s$  is the selection coefficient – defined as the difference in fitness between the two extreme  
148 pheno/genotypes ( $Z = 0$  or 1) at any of the ends of the map – and  $\omega$  is selection intensity, as already  
149 defined above. Part of the phenotype is environmentally determined, depending on trait heritability  
150 ( $h^2$ ). We explored a wide range of heritability values ( $h^2$ , uniform [0.01, 1]), kept constant over time  
151 within the same simulation. Our goal is to estimate the selection coefficient ( $s$ ), having nuisance  
152 parameters corresponding to the heritability of the trait ( $h^2$ ), migration ( $m$ ), mutation ( $\mu$ ) and growth  
153 ( $r$ ) rates.

154 *Six genetic architectures* – Six different genetic architectures were implemented for the trait  
155 under selection where the allelic effects were entirely additive within and between loci. First, we  
156 assumed a trait encoded by one locus and two co-dominant alleles (1L2A). In this case, only one  
157 mutation was needed to make the leap between the two extremes of phenotype. The second model  
158 still involved only one locus, but with multiple alleles (1L10A), whose effects on the phenotype were  
159 linear and additive. Here, there are only two alleles completely adapted to the two extremes of the  
160 environmental gradient; all other alleles have intermediate values, which are able to match the  
161 intermediate optima along the colonization range. The third genetic architecture was that of a trait  
162 encoded by ten bi-allelic loci (10L2A) where all loci are required to adapt to obtain the extreme  
163 phenotypes. A second version of this architecture was one with the same number of loci and alleles,  
164 but with allelic effects large enough for a mutation at a single locus to allow for perfect adaptation to  
165 the extremes (10L2A+). A fifth architecture involved 10 alleles at 10 loci (10L10A), similar to  
166 1L10A, but extended to ten independent loci. Similar to the extension of large allele effects applied  
167 in 10L2A+, a sixth architecture was defined with the possibility of any given locus as being able to  
168 modify the phenotype across its complete range (10L10A+). Mutation rate was scaled to the number  
169 of loci encoding the trait, so that the trait's mutation rate was the same across architectures (i.e. it was  
170 10× lower for each locus in the 10L architectures).

171 *ABC for selection* – One suitable way to address complex evolutionary questions is to  
172 implement approximate Bayesian computation (ABC). With this approach, one can assess the  
173 probability of different scenarios and parameter values therein via summary statistics, thus dismissing  
174 the need of an exact likelihood function (Beaumont et al. 2002). Summary-statistic values are taken  
175 from the observation (i.e. the real populations) and compared to the values of the same statistics  
176 obtained in simulations. A large number of simulations are then used to explore different  
177 combinations of parameter values; the simulations that better match the summary statistics values of  
178 the observation are then used to draw a posterior distribution of parameter values. As a Bayesian  
179 method, ABC can (and should) incorporate prior information on the parameter distributions into the  
180 simulated model. Here, we applied ABC to the estimation of selection in a spatially explicit setting  
181 involving range expansions. Since this a simulation study, the observations were also taken from the  
182 simulations in the form of pseudo-observations (see below).

183 *ABC: summary statistics* – Based on our previous experience with a similar set-up in natural  
184 populations of barn owls (Antoniazza et al. 2010, 2014), we decided to focus on isolation-by-distance  
185 (IBD) pattern statistics as the statistics more likely to reveal the presence of selection: From the  
186 correlation between pairwise geographic distance and pairwise pheno/genotypic distance, we  
187 extracted the mean, slope and sum of residuals for ten neutral multi-allelic markers ( $F_{ST}$ ), and the

188 phenotype ( $Q_{ST}$ ). Finally, we also retained the difference of slopes of IBD between the phenotype  
189 and the neutral markers ( $\Delta$ -slope), which represents how much steeper is the differentiation in the  
190 quantitative trait when compared to the one produced by the neutral loci (Fig. S1).

191 *ABC: parameter estimates and estimability assessment* – We tested the precision and accuracy  
192 of parameter estimates through ABC's validation approach as implemented in ABCtoolbox  
193 (Wegmann et al. 2010). Since the actual parameter values for all simulations are known (pseudo-  
194 observations), the ABC parameter-estimation pipeline was used to assess the quality of the estimates  
195 (i.e. how close the estimates were to the actual values). This was done by comparing 1000 of these  
196 estimates with their actual pseudo-observed values taken directly from the simulations, for each one  
197 of the genetic-architecture models. This procedure involved retaining the 1000 (out of ~1 million)  
198 simulations with summary statistics values closest to the pseudo- observation's, and then to use  
199 locally weighted linear regressions to obtain the posterior distributions for the parameter estimates  
200 (Wegmann et al. 2010). The overall estimability of selection coefficient for the different architectures  
201 was assessed using the coefficient of determination ( $R^2$ ) of the regression between the true value of  
202 the parameter (pseudo-observation) and the parameter point estimate (given by the mode of the  
203 posterior distribution) (Neuenschwander et al. 2008b). Two other statistics were also used to assess  
204 estimability: the root mean square error (RMSE), which depicts the prediction errors of our model by  
205 means of the mean absolute differences between pseudo-observations and estimates (Wegmann and  
206 Excoffier 2010); and proportion of the estimated posterior encompassing the pseudo-observed value  
207 for 50% and 95% of the higher-posterior density intervals (proportion of HPD50% and 95%). This  
208 latter statistics may indicate a low accuracy, when proportion of HPD50%  $\ll$  0.5, or HPD95%  $\ll$   
209 0.95; or excessive conservativeness, when proportion of HPD50%  $\gg$  0.5, or HPD95%  $\gg$  0.95.  
210 Ideally, HPD50% and 95% should be exactly 0.5 and 0.95, respectively.

211 Moreover, to assess the effect of the nuisance parameters ( $m$ ,  $r$ ,  $\mu$ ,  $h^2$ ) on the estimability of  
212 selection coefficients, a second test was devised in which the parameter space of each one of the  
213 nuisance parameters was restricted to ten quantiles. The estimations of selection coefficient were  
214 obtained only in that restricted space. For example, heritability ( $h^2$ ) varied randomly from 0.01 to 1  
215 across all simulations. To test whether estimates of selection were robust to a predetermined  $h^2$  value,  
216 we separated the simulations in ten different sets according to different quantile intervals of the  $h^2$   
217 prior distribution – e.g. the first interval includes the simulation in which  $h^2$  ranges from 0.01 to ~0.1.  
218 For each of the  $h^2$  intervals, we obtain estimations of selection coefficient ( $s$ ) that were then compared  
219 to their pseudo-observed value. This was also done for the other three nuisance parameters ( $m$ ,  $r$  and  
220  $\mu$ ) and across all six genetic architectures. Quantiles of the parameter values, instead of fixed bins,  
221 had to be used in order to insure that all estimates were made based on the same number of

222 simulations. This is because the inherent sampling process, combined with the failure of some  
223 simulations (see supplement), does not necessarily leads to the same density of simulations across the  
224 whole parameter space. So, for each quantile interval, 1000 estimates were run with 500 retained  
225 simulations, and the estimability was again measured by means of  $R^2$ , allowing for comparisons  
226 across the quantiles.



## 227 **Results**

228 Overall, the statistics related to the regressions between pairwise differentiation ( $Q_{ST}$ ) and pairwise  
229 geographical distances were very sensitive to variation in selection strength, regardless of the genetic  
230 architecture implemented (Fig. 3). In particular, the difference of  $Q_{ST}$  and  $F_{ST}$  IBD slopes ( $\Delta$ -slope)  
231 showed to be particularly responsive to small selection coefficients, while mean differentiation on  
232 the phenotype (mean  $Q_{ST}$ ) was more sensitive to moderate and high selection coefficients.  
233 Additionally, as expected for independent neutral loci, the statistics related to  $F_{ST}$  alone did not vary  
234 with the selection coefficients (results not shown). For nearly all architectures, mean  $Q_{ST}$  showed a  
235 constant quasi-linear increase with higher selection coefficients (Fig. 3A). The only two exceptions  
236 were the 1L2A and the 10L2A+ (with large-effect alleles) architecture models. In fact, these two  
237 architectures showed very concordant responses also in the other statistics, such as  $\Delta$ -slope (Fig. 3B).  
238 In both cases, one can observe a lack of points for high selection coefficient values ( $s > 0.5$ ). Indeed,  
239 these simulations failed to colonize the entire habitat (further examined below in ‘Discussion’).  
240 Moreover,  $\Delta$ -slope, for all architectures, reaches an asymptote when  $s > 0.4$ . This is because, when  
241 selection is very strong, even closely neighboring demes are highly differentiated (high  $Q_{ST}$ ). This  
242 leads to high mean  $Q_{ST}$ , but limits (or even reduces) the values obtained for the slope of differentiation  
243 across the environmental gradient (Fig 3B). Noteworthy are also the similarities between 1L10A and  
244 10L10A+.

245 The quality of estimates for selection coefficient ( $s$ ) in all models was high (Table 1, Fig. 4).  
246 The genetic-architecture models 1L10A, 10L2A, 10L10A and 10L10A+ had particularly high  
247 coefficients of determinations ( $R^2 > 0.9$ ), with 1L2A and 10L2A+ falling shortly behind ( $R^2 > 0.7$ ).  
248 This difference among the architectures derives from the differences in the summary statistics  
249 (above), where simulations with  $s > 0.5$  failed to leave any signature on the summary statistics (Fig.  
250 3), resulting in a limited range of  $s$  values (Fig. 4). Furthermore, the root mean square error values  
251 were proportionally low for all architectures (RMSE  $\approx$  5 to 9% of  $s$  estimates), implying a very high  
252 accuracy of estimates. The proportion of posterior-estimate distributions that encompassed the  
253 pseudo-observed value – both with HPD50% and 95% – resulted in conservative estimates (Table 1),  
254 with proportion values always larger than the HPD interval. This suggests that, even though accurate,  
255 the posterior distributions are not necessarily very precise, with rather wide ranges.

256 Remarkably, in our simulations, the estimability results are robust to the variation in the  
257 nuisance parameters and to the position in the largest part of the nuisance parameters’ space, with the  
258 clear exception of lower values of heritability ( $h^2 < 0.1$ ) for all architectures and also, to a lesser  
259 extent, lower values of mutation rate for some architecture models (Fig. 5). Interestingly, variation in  
260 migration ( $m$ ) and growth rate ( $r$ ) in the interval explored ( $m = [0.1, 0.4]$  and  $r = [0.2, 0.8]$ ) has very

261 little effect. Here too, there seems to be a ranking of estimation quality among the genetic-architecture  
262 models across the nuisance parameter quantiles: 1L2A and 10L2A+ being the worse (but still good);  
263 followed by 10L10A; and then having 10L10A+, 10L2A and 1L10A as the better ones.

## 264 Discussion

265 We have shown that it is possible to assess selection and estimate its intensity in range expansions by  
266 taking advantage of the information contained in IBD-derived statistics and by using spatially explicit  
267 simulations. Even though plenty of variance in the response of the summary statistics was observed  
268 when comparing the different genetic-architecture models, in all cases, selection left a distinctive  
269 signature on these statistics. It seems, however, that the probability of the populations to respond to  
270 selection was not the same across all architectures. In a nutshell, the more alleles and loci encoded  
271 the trait; the better was the estimation of the selection coefficient.

272 The architectures can be divided in three groups: (i) 1L10A and 10L10A+ with very high  $R^2$   
273 and low RMSE (i.e. very good estimability), (ii) 10L2A and 10L10A with still high  $R^2$  and low RMSE  
274 values but with a distinct signature in the  $\Delta$ -slope statistic (Fig. 3B), and (iii) 1L2A and 10L2A+ with  
275 slightly worse  $R^2$  and RMSE results. Not surprisingly, these last two architectures are also the ones  
276 that present the least number of allele combinations (within the phenotypic range between  $Z = 0$  and  
277 1) that could lead to adaptation across the selection gradient. The 1L2A model has only three possible  
278 genotypes to be translated into phenotypes. In essence, this architecture is just as capable as the others  
279 to adapt to the two extremes and the exact center of our simulated environment (patches p0, p50 and  
280 p25, respectively). However, this does not apply for any of the patches in between. In these other  
281 patches, there is no combination of alleles that would make an individual perfectly adapted to the  
282 local conditions. This same explanation applies to 10L2A+ because the large-effect alleles turn up to  
283 make too big a leap in between pheno/genotypic values ( $Z$  in Fig. 1). Indeed, if a second locus mutates  
284 as well in 10L2A+, the  $Z$ -value of the resulting phenotype would almost certainly fall outside the  
285 range of adapted phenotypes in all patches ( $Z = 0$  to 1). This is why, when selection is too strong ( $s$   
286  $> 0.5$ ), simulations failed to finish the colonization due to the recurrent extinction of pioneer  
287 populations. Conversely, all the other architectures present many more  $Z$ -value combinations  
288 allowing to locally adapt to all patches across the colonization range. These results may suggest that  
289 adaptation may be easier to occur when many loci and alleles contribute to a trait – offering several  
290 to many combinations of loci and alleles in order to adapt to the local conditions – in agreement with  
291 previous studies (Le Corre and Kremer 2012; Gilbert and Whitlock 2017).

292 It is important to highlight the impact of the inclusion of spatial information in the  
293 understanding of the effect of selection in range-expansion scenarios. The process of range expansion  
294 is essentially a spatial phenomenon and, to fully understand its outcome, a spatially explicit approach  
295 is warranted. Even though some of the statistics we used – mean  $F_{ST}$  and  $Q_{ST}$  – do not explicitly  
296 contain spatial information, it was only with the addition of  $\Delta$ -slope and the other IBD-associated  
297 statistics that we managed to grasp the full extent of the effect of selection in range-expansion  
298 processes. The importance of the spatial dimension in population genetics is not a novel idea, though.

299 It has been explored in numerous previous publications, both in the disciplines of phylogeography  
300 (Avice et al. 1987; Diniz-Filho et al. 2008) and in landscape genetics (Manel et al. 2003). Studies  
301 looking for signatures of selection, however, have been systematically neglecting the relevance of the  
302 spatial distribution of genes and phenotypes (Li et al. 2012).

303 Furthermore, combining more than one pattern statistics (at least mean  $Q_{ST}$  and  $\Delta$ -slope, Fig.  
304 3) seems to be of key importance to properly assess the effect of selection on populations facing range  
305 expansions. For instance, the analysis of mean  $Q_{ST}$  alone could lead to false positives when selection  
306 is very low (virtually zero), given that a few observations of high overall differentiation appear in  
307 these quasi-neutral conditions (Fig. 3A). Also, looking at  $\Delta$ -slope alone could lead to false negatives  
308 – or simply lack of information – when selection is too strong, leading to less steep slopes than the  
309 ones observed at intermediate selection coefficients (Fig. 3B). Therefore, to properly benefit from  
310 our proposed ABC approach, we believe that one should always, of course, consider all available  
311 information contained in the different IBD pattern statistics.

312 Even though we modeled selection via intensity of selection ( $\omega$ ) – a parameter widely used in  
313 quantitative genetics (Falconer and MacKay 1996) – we decided to estimate selection through  
314 selection coefficient ( $s$ ), which is a relatively more common measure in population genetics (Hartl  
315 and Clark 2007). Selection coefficient is a parameter whose effect on fitness ( $W$ ) is directly accessible  
316 ( $W = 1 - s$ ), making biological interpretation easier. Also, while  $\omega$  had to be treated in the logarithmic  
317 scale (to obtain a more linear relation with the summary statistics),  $s$  could be dealt with in a linear  
318 scale. Besides, the results for estimability calculated for  $\log_{10}\omega$  showed only a slight trend to lower  
319  $R^2$  values and did not differ substantially from the ones obtained with  $s$  (Table S1). Regarding the  
320 scale of selection coefficient here, it is worth to remember that it concerns the difference in fitness in  
321 the extreme patches and the difference in fitness between the extreme pheno/genotypes ( $p_0$  and  $p_{50}$ ,  
322 Fig. 1). It becomes smaller as one approaches the center of the map and/or compares closer  
323 pheno/genotypes, and therefore represents the maximum strength of selection operating in the system.

324 We mentioned that some simulations “failed to finish the colonization altogether”. This  
325 requires further explanation. By failed simulations, we do not necessarily mean simulation where the  
326 population went extinct, but actually simulations that resulted in missing-data (NA) for any of the  
327 statistics. First, the simulations were run assuming a hard-selection system (i.e. individual fitness is  
328 absolute). So – even though local populations could react to loss of individuals via population growth  
329 ( $r$ ) – if selection was too strong and no locally-adapted individuals were yet present at the population,  
330 that specific deme would go extinct delaying or stopping the wave of expansion. Alternatively, we  
331 also ran the same simulations with a soft-selection system (supplementary material). These showed  
332 a lower failure rate, but did not affect further results, suggesting that the approach presented here is  
333 also robust to the softness of the selection implemented. Second, some architecture models lead to

334 higher failure rates than others, predominantly due to the non-colonization effect described above.  
335 This is again related to the limited combinations of loci and alleles observed in architectures 1L2A  
336 and 10L2A+. As a result, the realized prior distribution (i.e. the parameter distribution after the  
337 removal of simulations containing NAs) for selection intensity ( $\omega$ ) – and therefore selection  
338 coefficient ( $s$ , as in Fig. 2) – was altered for these two architectures, being limited to  $\omega = 10^{-0.5}$  to  $10^2$   
339 ( $s \approx 0.8$  to  $0$ , respectively, Fig. S2 and S3). Beyond selection strength, for the other simulation  
340 parameters (i.e. nuisance parameters), there was no differential effect of the architecture model on  
341 the way these parameters produced simulations containing missing data. There was, however, a more  
342 elevated missing data production, for all architectures, associated with low mutation rates (when  $\mu <$   
343  $10^{-4}$ ), when not enough variation was produced to adapt to new environments; low growth rates ( $r <$   
344  $0.3$ ), when the negative effect of higher selection coefficients was stronger on the populations; and,  
345 to a lesser extent, higher migration rates, where the homogenizing effect of migration more often  
346 erased the differentiation signatures created by selection. As a result, the prior distributions for the  
347 nuisance parameters were altered after the removal of such failed simulations (Fig. S2).  
348 Consequently, the ten quantiles presented in Fig. 5 do not necessarily represent 10% intervals of the  
349 original prior distributions, but rather regular intervals taken from realized prior distributions. The  
350 analysis was done this way in order to have the same number of simulations out of which to make the  
351 estimates in each interval, allowing for a balanced comparison of estimability across quantiles.

352 The estimability of selection was little affected by variation in the nuisance parameters, as  $R^2$   
353 remained well above 0.7 for all genetic architecture models across most of these parameters'  
354 distributions. Some of the architectures seemed to be more sensitive to the noise caused by these  
355 parameters than others: Again, 1L2A and 10L2A+ showed to be the most sensitive models, probably,  
356 due to the lack of possible genotypic combinations, limiting adaptation to intermediary positions  
357 across the environmental gradient, as discussed above. However, the variation in mutation rate also  
358 had some effect on these architectures. The lower the mutation rate, the harder to deal with very  
359 strong selection, especially when combinations are limited. Another architecture in which selection  
360 estimability strongly responded to mutation rate was 10L10A. Curiously, this is the one with highest  
361 number of genotype combinations. This can be explained by the fact that it also is the architecture  
362 that needs the most mutations in order to adapt to the opposite environmental conditions during the  
363 range expansion. All ten loci need to adapt by fixing one of ten possible alleles each. Finally, as one  
364 could already expect, low values of heritability led to lower estimability for all architectures. Clearly,  
365 if the trait under selection has a very small genetic component, selection can do very little to affect  
366 the differentiation of the quantitative trait, leaving no signature of adaptation in the pattern statistics  
367 we explored, or any other statistics one could think of, as well.

368 It is still computationally expensive to run the individual-based spatially explicit simulations  
369 required to study the evolution of quantitative traits in range expansions, especially with several  
370 models of genetic architecture (e.g. ~350 CPU days for 1 million simulations on a Linux server with  
371 2.4GHz Intel Xeon processors). This is because an ABC implementation generally requires many  
372 simulations (at least 1 million) to obtain reliable parameter estimates (Fagundes et al. 2007;  
373 Neuenschwander et al. 2008b), even though this can be dependent at a large extent on the number of the  
374 parameters to be estimated (i.e. the dimensions of the parameter space to explore). Alternatively,  
375 improvements on the ABC algorithm such as MCMC-ABC (Wegmann et al. 2009) can help reducing  
376 the number of simulations needed for investigating a given question. Besides, selection was not the  
377 only parameter varying in our model. Nuisance parameters, even though not estimated, also affect  
378 the parameter space to be explored by the simulations. These do not have to be used, though: We  
379 added them to our analysis to assess the robustness of our estimates, but this does not need to be done  
380 in empirical studies. An approach that could be followed in such studies would be a two-step ABC  
381 analysis (Bazin et al. 2010), where (i) one would determine a neutral demographic background based  
382 on neutral markers and coalescent simulations, and (ii) then use the estimates of this previous step as  
383 priors for the following one in which individual-based simulations would be run to explore a different  
384 set of fewer parameters (e.g. selection coefficient and heritability), assuming that the effects of  
385 selection on demography would have already been captured in the first step.

386 Contrary to an impression one might get reading some of the recent theoretical literature on  
387 range expansions (Klopfstein et al. 2006; Travis et al. 2007; Excoffier et al. 2009; Peischl et al. 2013),  
388 selection is able to operate in such scenarios. Recent empirical studies have been showing evidence  
389 that adaptation has occurred in several cases (Hughes et al. 2007; Antoniazza et al. 2010, 2014; Monty  
390 and Mahy 2010; Road et al. 2012). When compared to allele surfing, selection seems to be much  
391 more efficient in producing differentiation across the range of an expansion, according to our results.  
392 Even though we observed consistent isolation by distance in the neutral loci (proxy for pure allele  
393 surfing), this isolation was always much lower than what was observed for the trait under selection.

394 The direct observation of some simulations provided evidence that locally maladapted  
395 variants could appear and reach relatively high frequencies during the range expansion process (Fig.  
396 S4), but these events tended to be transient and were quickly erased by selection, leaving virtually no  
397 signature after the whole map had been occupied. This observation may be the result of the model  
398 implemented here, where only one locus or a few loci were involved with selection and, therefore,  
399 could bear locally maladaptive (deleterious) variants. Another theoretical study, focused on the  
400 evolution of genetic load, provided evidence that, when many loci are involved, the overall  
401 deleterious load of populations undergoing range expansions tends to increase (PEISCHL *et al.* 2013).  
402 Indeed, there seems to be a decrease in the efficiency of purifying selection in purging a genome-

403 wide deleterious load during range expansion (i.e. expansion load). However, here we investigated a  
404 process involving positive selection acting on one specific phenotypic trait whose genetic architecture  
405 was relatively simple. It is in this situation, we showed that natural selection during range expansions  
406 is still effective. Furthermore, in real populations, the simultaneous occurrence of adaptation at a  
407 given trait with the accumulation of an expansion load is perfectly possible and may be one  
408 explanation for the success of so many range expansions observed in nature. The combined effect of  
409 these two processes, however, remains to be more carefully investigated in the future.

410 Even though neutrality (including background selection) (Kimura 1984) should always be the  
411 null hypothesis for any investigation of a process leading to a given observed pattern, we believe that  
412 here we have gathered sufficient *in silico* evidence that selection can operate on range expansion  
413 scenarios, leaving a distinguishable signature in spatially explicit statistics. Furthermore, this  
414 signature allows estimating the strength of selection operating on the study system and could be  
415 promptly used in empirical studies investigating selection in range expansion scenarios – which could  
416 be post-glacial recolonizations, species invading new habitats, or populations coping with  
417 environmental changes. All of these processes were and still are very common, not only in temperate  
418 regions (Hewitt 2004), but also anywhere else on the globe, rendering the spatially explicit ABC  
419 approach presented here particularly valuable.

420 **Acknowledgments**

421 The computations were performed at the Vital-IT (<http://www.vital-it.ch>) Center for high-  
422 performance computing of the SIB Swiss Institute of Bioinformatics. We would like to thank  
423 Laurèle Faye and Rémi Matthey-Doret for helping in initial stages of this project and Sylvain  
424 Antoniazza for many fruitful discussions that helped in the development of this study. JG had  
425 financial support from the Swiss National Science Foundation (SNSF) grant number  
426 31003A\_138180.



427 **Tables**

428 **Table 1:** Assessment of selection coefficient ( $s$ ) estimability for all genetic architectures.  $R^2$  stands  
429 for the coefficient of determination of the pseudo-observation on the estimates; RMSE is root mean  
430 square error of the estimates; and Prop. HPD50% and HPD95% represent the proportion of posterior  
431 distributions encompassing the pseudo-observed value. These values were obtained based on 1000  
432 estimates, with 1000 retained simulations out of 1 million simulations, under a stabilizing hard  
433 selection system.

434

| Architecture   | $R^2$ | RMSE  | Prop. HPD50% | Prop. HPD95% |
|----------------|-------|-------|--------------|--------------|
| <b>1L2A</b>    | 0.837 | 0.049 | 0.726        | 0.988        |
| <b>1L10A</b>   | 0.958 | 0.065 | 0.646        | 0.982        |
| <b>10L2A</b>   | 0.952 | 0.066 | 0.703        | 0.989        |
| <b>10L2A+</b>  | 0.738 | 0.056 | 0.665        | 0.992        |
| <b>10L10A</b>  | 0.911 | 0.087 | 0.654        | 0.988        |
| <b>10L10A+</b> | 0.963 | 0.060 | 0.590        | 0.971        |

435

436 **Figures**

437

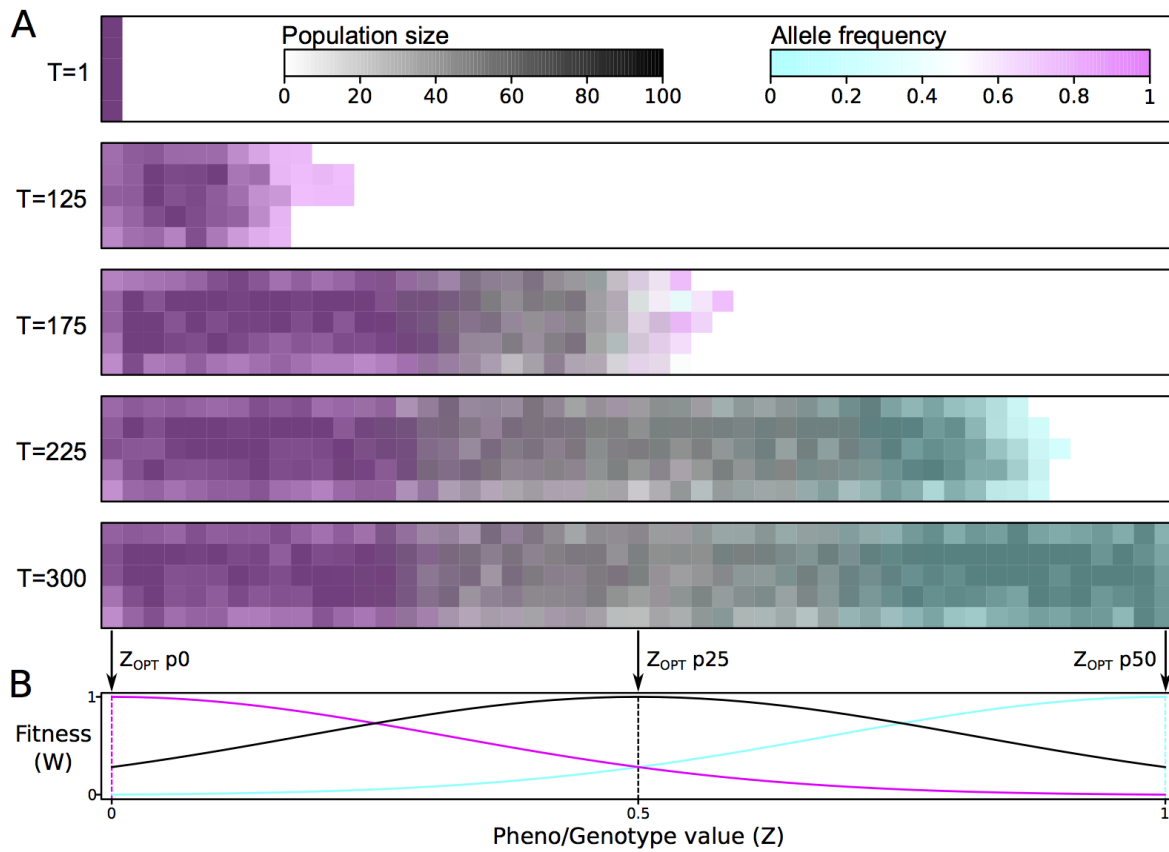

438

439

440

441

442

443

444

445

**Figure 1:** Implementation of the simulations with range expansion over a selection gradient. In **A**, the range expansion process over 300 generations (T), across the simulated map (51x5 demes). Two layers overlap here: population size (gray scale, underneath) and frequency of the allele adapted to the left-hand side of the map (cyan-magenta scale). In **B**, the fitness landscape for three patches from above (p0 magenta, p25 black, and p50 cyan) with selection intensity  $\omega=0.1$  and pheno/genotype space defined between 0 and 1. Note that the x-axis in B (Z-value) is different from the one in A (deme position p).

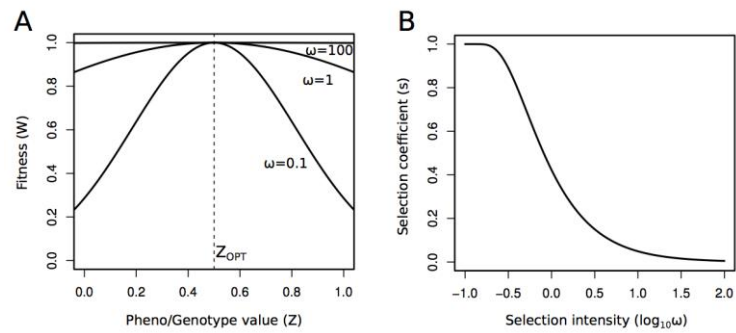

446

447

448

449

450

451

**Figure 2:** Fitness distribution and selection coefficient under different selection intensities ( $\omega$ ). In **A**, different fitness distributions with  $Z_{OPT}$  always at 0.5, as in patch p25 (see Fig. 1B), depicting the extremes of the  $\omega$  prior distribution  $\omega=0.1$  and 100. In **B**, the effect of  $\omega$  on the difference of fitness [i.e. selection coefficient (s)] between opposing pheno/genotype values at the extreme patches (p0 and p50).

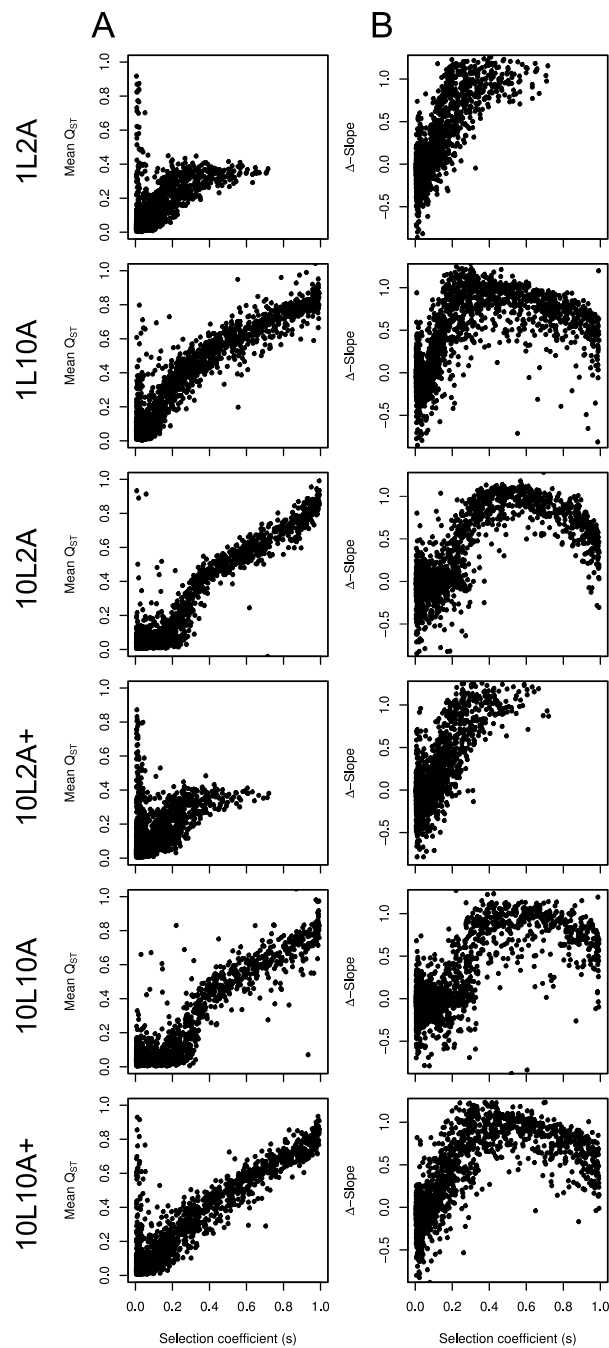

452

453

454

455

456

**Figure 3:** The relation between selection coefficient ( $s$ ) and the most informative pattern statistics used to assess the selection coefficient. For all six architectures, in **A**, the response of mean differentiation across populations (Mean  $Q_{ST}$ ); and in **B**, the response of the difference between the  $Q_{ST}$  and the neutral  $F_{ST}$  slopes of IBD ( $\Delta$ -Slope).

457

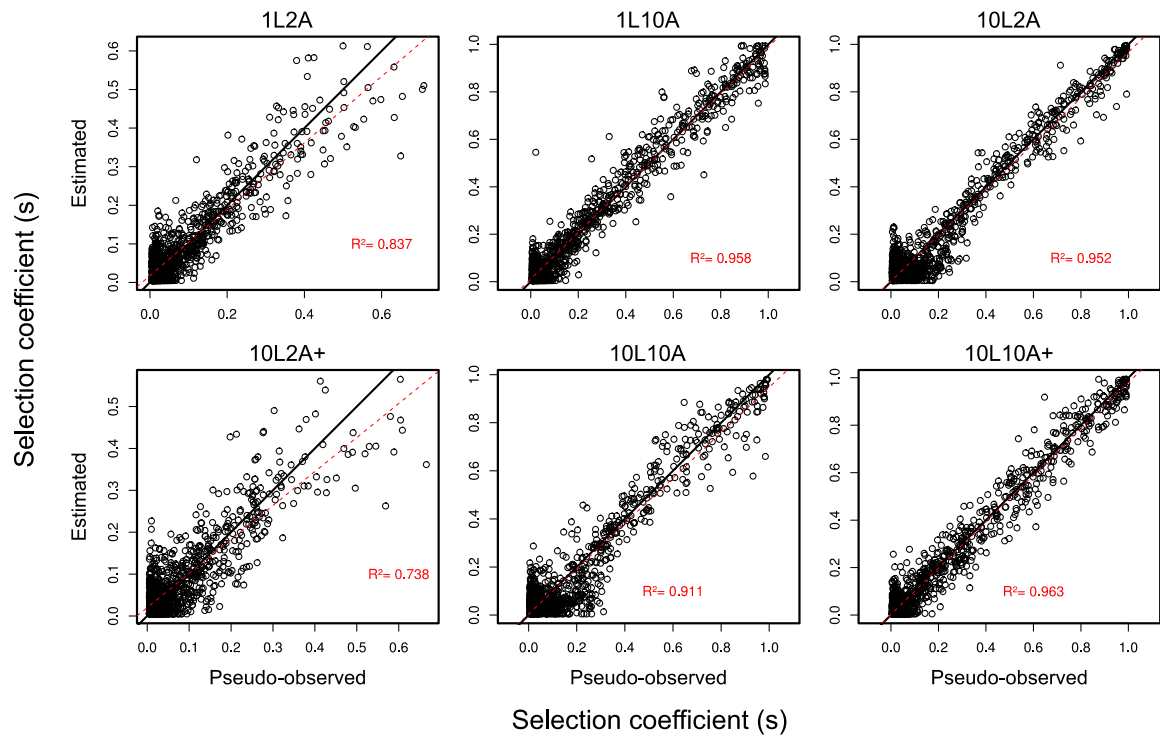

458

459 **Figure 4:** Validation plots, pseudo-observed vs. estimated, for selection coefficient (s). For  
460 each genetic-architecture model, a plot of 1000 simulations' actual selection coefficient values  
461 (s) against their estimates (open circles). The back line stands for the perfect diagonal; and the  
462 red dashed line, the calculated linear regression. Coefficients of determination of the pseudo-  
463 observation on the estimates ( $R^2$ ) are also reported in red.

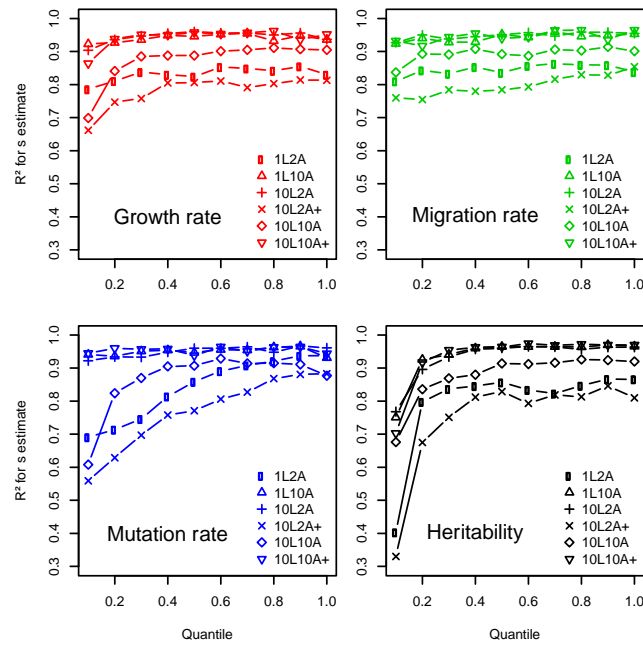

464

465

466

467

468

**Figure 5:** Estimability assessment across the nuisance-parameter space, for all genetic architectures. In each panel, the estimability of selection coefficient (by means of  $R^2$ ) is shown for ten different quantiles of the realized prior distributions for the four nuisance parameters (each panel) and all six genetic architectures (within panels).

## 469 **References**

- 470 Antoniazza, S., R. Burri, L. Fumagalli, J. Goudet, and A. Roulin. 2010. Local adaptation maintains clinal  
471 variation in melanin-based coloration of European barn owls (*Tyto alba*). *Evolution* (N. Y). 64:1944–  
472 54.
- 473 Antoniazza, S., R. Kanitz, S. Neuenschwander, R. Burri, A. Gaigher, A. Roulin, and J. J. Goudet. 2014.  
474 Natural selection in a post-glacial range expansion: the case of the colour cline in the European barn  
475 owl. *Mol. Ecol.* 23.
- 476 Avise, J. C., J. Arnold, R. M. Ball, E. Bermingham, T. Lamb, J. E. Neigel, C. A. Reeb, and N. C. Saunders.  
477 1987. Intraspecific Phylogeography - the Mitochondrial-DNA Bridge between Population-Genetics and  
478 Systematics. *Annu. Rev. Ecol. Syst.* 18:489–522.
- 479 Barton, N. H. 1999. Clines in polygenic traits. *Genet. Res.* 74:223–36.
- 480 Barton, N. H., and G. M. Hewitt. 1985. Analysis of Hybrid Zones. *Annu. Rev. Ecol. Syst.* 16:113–148.
- 481 Bazin, E., K. J. Dawson, and M. A. Beaumont. 2010. Likelihood-free inference of population structure and  
482 local adaptation in a Bayesian hierarchical model. *Genetics* 185:587–602.
- 483 Bazykin, A. D. 1969. Hypothetical mechanism of speciation. *Evolution* (N. Y). 23:685–687.
- 484 Beaumont, M. a, W. Zhang, and D. J. D. Balding. 2002. Approximate Bayesian computation in population  
485 genetics. *Genetics* 162:2025–2035.
- 486 Colautti, R. I., and S. C. H. Barrett. 2013. Rapid adaptation to climate facilitates range expansion of an  
487 invasive plant. *Science* 342:364–366.
- 488 Colinvaux, P. A., P. E. De Oliveira, and M. B. Bush. 2000. Amazonian and neotropical plant communities  
489 on glacial time-scales: The failure of the aridity and refuge hypotheses. *Quat. Sci. Rev.* 19:141–169.
- 490 Currat, M., L. Excoffier, W. Maddison, S. P. Otto, N. Ray, M. C. Whitlock, and S. Yeaman. 2006. Comment  
491 on “Ongoing adaptive evolution of ASPM, a brain size determinant in homo sapiens” and  
492 “microcephalin, a gene regulating brain size, continues to evolve adaptively in humans.” *Science* (80-  
493 ). 313.
- 494 Diniz-Filho, J. A. F., M. P. de Campos Telles, S. L. Bonatto, E. Eizirik, T. R. O. de Freitas, P. de Marco, F.  
495 R. Santos, A. Sole-Cava, and T. N. Soares. 2008. Mapping the evolutionary twilight zone: molecular  
496 markers, populations and geography. *J. Biogeogr.* 35:753–763.
- 497 Edmonds, C. A., A. S. Lillie, and L. L. Cavalli-Sforza. 2004. Mutations arising in the wave front of an  
498 expanding population. *Proc Natl Acad Sci U S A* 101:975–979.
- 499 Endler, J. A. 1973. Gene flow and population differentiation. *Science* (80-. ). 179:243–250.
- 500 Endler, J. A. 1977. *Geographic Variation, Speciation, and Clines*. Princeton University Press, Princeton.
- 501 Ewens, W. J. 1977. *Population Genetics Theory in Relation to the Neutralist-Selectionist Controversy*. Pp.

- 502 67–134 in H. Harris and K. Hirschhorn, eds. *Advances in Human Genetics* 8. Springer US.
- 503 Excoffier, L., M. Foll, J. Petit, and R. J. Petit. 2009. Genetic Consequences of Range Expansions. *Annu.*  
504 *Rev. Ecol. Evol. Syst.* 40:481–501.
- 505 Excoffier, L., and N. Ray. 2008. Surfing during population expansions promotes genetic revolutions and  
506 structuration. *Trends Ecol. Evol.* 23:347–351.
- 507 Fagundes, N. J. R., N. Ray, M. Beaumont, S. Neuenschwander, F. M. Salzano, S. L. Bonatto, L. Excoffier,  
508 L. Excof, B. Geno, and L. Excoffier. 2007. Statistical evaluation of alternative models of human  
509 evolution. *Proc Natl Acad Sci U S A* 104:17614–17619.
- 510 Falconer, D. S., and T. F. C. MacKay. 1996. *Introduction to quantitative genetics.*
- 511 García-Gil, M., M. Mikkonen, and O. Savolainen. 2003. Nucleotide diversity at two phytochrome loci along  
512 a latitudinal cline in *Pinus sylvestris*. *Mol. Ecol.* 12:1195–1206.
- 513 Gilbert, K. J., N. P. Sharp, A. L. Angert, G. L. Conte, J. A. Draghi, F. Guillaume, A. L. Hargreaves, R.  
514 Matthey-doret, and M. C. Whitlock. 2017. Local Adaptation Interacts with Expansion Load during  
515 Range Expansion: Maladaptation Reduces Expansion Load. *Am. Nat.* 189:368–380.
- 516 Gilbert, K. J., and M. C. Whitlock. 2017. The genetics of adaptation to discrete heterogeneous environments:  
517 frequent mutation or large-effect alleles can allow range expansion. *J. Evol. Biol.* 30:591–602.
- 518 Gralka, M., F. Stiewe, F. Farrell, W. Möbius, B. Waclaw, and O. Hallatschek. 2016. Allele surfing promotes  
519 microbial adaptation from standing variation. *Ecol. Lett.* 889–898.
- 520 Hallas, R., M. Schiffer, and A. A. Hoffmann. 2002. Clinal variation in *Drosophila serrata* for stress  
521 resistance and body size. *Genet. Res.* 79:141–148.
- 522 Hartl, D. L., and A. G. Clark. 2007. *Principles of Population Genetics.*
- 523 Hewitt, G. M. 2004. Genetic consequences of climatic oscillations in the Quaternary. *Philos Trans R Soc L.*  
524 *B Biol Sci* 359:183–195.
- 525 Hewitt, G. M. 1996. Some genetic consequences of ice ages, and their role in divergence and speciation.  
526 *Biol. J. Linn. Soc.* 58:247–276.
- 527 Hewitt, G. M. 2000. The genetic legacy of the Quaternary ice ages. *Nature* 405:907–913.
- 528 Hey, J. 1999. The neutralist, the fly and the selectionist. *Trends Ecol. Evol.* 14:35–38.
- 529 Hofer, T., N. Ray, D. Wegmann, and L. Excoffier. 2009. Large allele frequency differences between human  
530 continental groups are more likely to have occurred by drift during range expansions than by selection.  
531 *Ann Hum Genet* 73:95–108.
- 532 Hughes, C. L., C. Dytham, and J. K. Hill. 2007. Modelling and analysing evolution of dispersal in  
533 populations at expanding range boundaries. *Ecol. Entomol.* 32:437–445.
- 534 Ingvarsson, P. K., M. V. García, D. Hall, V. Luquez, and S. Jansson. 2006. Clinal variation in phyB2, a



- 535 candidate gene for day-length-induced growth cessation and bud set, across a latitudinal gradient in  
536 European aspen (*Populus tremula*). *Genetics* 172:1845–1853.
- 537 Jepsen, J. U., S. B. Hagen, R. A. Ims, and N. G. Yoccoz. 2008. Climate change and outbreaks of the  
538 geometrids *Operophtera brumata* and *Epirrita autumnata* in subarctic birch forest: evidence of a recent  
539 outbreak range expansion. *J. Anim. Ecol.* 77:257–264.
- 540 Kimura, M. 1984. *The neutral theory of molecular evolution*. Cambridge University Press.
- 541 Klopstein, S., M. Currat, and L. Excoffier. 2006. The fate of mutations surfing on the wave of a range  
542 expansion. *Mol. Biol. Evol.* 23:482–90.
- 543 Kronholm, I., F. X. Picó, C. Alonso-Blanco, J. Goudet, and J. De Meaux. 2012. GENETIC BASIS OF  
544 ADAPTATION IN *ARABIDOPSIS THALIANA*: LOCAL ADAPTATION AT THE SEED  
545 DORMANCY QTL *DOG1*. *Evolution* (N. Y). 66:2287–2302.
- 546 Le Corre, V., and A. Kremer. 2012. The genetic differentiation at quantitative trait loci under local  
547 adaptation. *Mol. Ecol.* 21:1548–1566.
- 548 Leimar, O., M. Doebeli, and U. Dieckmann. 2008. Evolution of phenotypic clusters through competition and  
549 local adaptation along an environmental gradient. *Evolution* (N. Y). 62:807–22.
- 550 Li, J., H. Li, M. Jakobsson, S. Li, P. Sjödin, and M. Lascoux. 2012. Joint analysis of demography and  
551 selection in population genetics: where do we stand and where could we go? *Mol. Ecol.* 21:28–44.
- 552 Manel, S., M. K. Schwartz, G. Luikart, and P. Taberlet. 2003. Landscape genetics: combining landscape  
553 ecology and population genetics. *Trends Ecol. Evol.* 18:189–197.
- 554 Monty, A., and G. Mahy. 2010. Evolution of dispersal traits along an invasion route in the wind-dispersed  
555 *Senecio inaequidens* (Asteraceae). *Oikos* 119:1563–1570.
- 556 Moreau, C., C. Bherer, H. Vezina, M. Jomphe, D. Labuda, and L. Excoffier. 2011. Deep Human Genealogies  
557 Reveal a Selective Advantage to Be on an Expanding Wave Front. *Science* (80-. ). 334:1148–1150.
- 558 Mullen, L. M., and H. E. Hoekstra. 2008. Natural selection along an environmental gradient: a classic cline  
559 in mouse pigmentation. *Evolution* (N. Y). 62:1555–1570.
- 560 Nei, M. 2005. Selectionism and neutralism in molecular evolution. *Mol. Biol. Evol.* 22:2318–42.
- 561 Nei, M., Y. Suzuki, and M. Nozawa. 2010. The neutral theory of molecular evolution in the genomic era.  
562 *Annu Rev Genomics Hum Genet* 11:265–289.
- 563 Neuenschwander, S., F. Hospital, F. Guillaume, and J. Goudet. 2008a. quantiNemo: an individual-based  
564 program to simulate quantitative traits with explicit genetic architecture in a dynamic metapopulation.  
565 *Bioinformatics* 24:1552–1553.
- 566 Neuenschwander, S., C. R. Largiadèr, N. Ray, M. Currat, P. Vonlanthen, and L. Excoffier. 2008b.  
567 Colonization history of the Swiss Rhine basin by the bullhead (*Cottus gobio*): inference under a

- 568 Bayesian spatially explicit framework. *Mol. Ecol.* 17:757–72.
- 569 Neuenschwander, S., F. Michaud, and J. Goudet. 2018. QuantiNemo 2: a Swiss knife to simulate complex  
570 demographic and genetic scenarios, forward and backward in time. *Bioinformatics* 1–2.
- 571 Parmesan, C., and G. Yohe. 2003. A globally coherent fingerprint of climate change impacts across natural  
572 systems. *Nature* 421:37–42.
- 573 Peischl, S., I. Dupanloup, M. Kirkpatrick, L. Excoffier, and F. T. H. E. Cover. 2013. On the accumulation of  
574 deleterious mutations during range expansions. *Mol. Ecol.* 22:5972–5982.
- 575 Peischl, S., and L. Excoffier. 2015. Expansion load: Recessive mutations and the role of standing genetic  
576 variation. *Mol. Ecol.* 24:2084–2094.
- 577 Road, W., A. D. Building, W. Bank, W. Road, J. Buckley, R. K. Butlin, J. R. Bridle, W. Road, A. D.  
578 Building, W. Bank, and W. Road. 2012. Evidence for evolutionary change associated with the recent  
579 range expansion of the British butterfly, *Aricia agestis*, in response to climate change. *Mol. Ecol.*  
580 21:267–280.
- 581 Roth, D., B. Henry, S. Mak, M. Fraser, M. Taylor, M. Li, K. Cooper, A. Furnell, Q. Wong, and M. Morshed.  
582 2010. West Nile Virus Range Expansion into British Columbia. *Emerg. Infect. Dis.* 16:1251–1258.
- 583 Rundell, R. J., and T. D. Price. 2009. Adaptive radiation, nonadaptive radiation, ecological speciation and  
584 nonecological speciation. *Trends Ecol. Evol.* 24:394–399.
- 585 Savolainen, O., T. Pyhäjärvi, and T. Knürr. 2007. Gene Flow and Local Adaptation in Trees. *Annu. Rev.*  
586 *Ecol. Evol. Syst.* 38:595–619.
- 587 Thorpe, R. . 1984. Primary and secondary transition zones in speciation and population differentiation: a  
588 phylogenetic analysis of range expansion. *Evolution (N. Y.)*. 38:233–243.
- 589 Travis, J. M. J., and C. Dytham. 2002. Dispersal evolution during invasions. *Evol. Ecol. Res.* 4:1119–1129.
- 590 Travis, J. M. J., T. Mu, O. J. Burton, A. Best, C. Dytham, K. Johst, T. Munkemuller, O. J. Burton, A. Best,  
591 C. Dytham, and K. Johst. 2007. Deleterious mutations can surf to high densities on the wave front of an  
592 expanding population. *Mol. Biol. Evol.* 24:2334–2343.
- 593 Wagner, A. 2008. Neutralism and selectionism: a network-based reconciliation. *Nat Rev Genet* 9:965–974.
- 594 Walther, G., A. Roques, P. E. Hulme, M. T. Sykes, P. Pyšek, I. Kühn, M. Zobel, S. Bacher, Z. Botta-Dukát,  
595 and H. Bugmann. 2009. Alien species in a warmer world: risks and opportunities. *Trends Ecol. Evol.*  
596 24:686–693.
- 597 Weeks, A. R., S. W. McKechnie, and A. A. Hoffmann. 2002. Dissecting adaptive clinal variation: Markers,  
598 inversions and size/stress associations in *Drosophila melanogaster* from a central field population. *Ecol.*  
599 *Lett.* 5:756–763.
- 600 Wegmann, D., and L. Excoffier. 2010. Bayesian inference of the demographic history of chimpanzees. *Mol.*

- 601 Biol. Evol. 27:1425–1435.
- 602 Wegmann, D., C. Leuenberger, and L. Excoffier. 2009. Efficient approximate Bayesian computation coupled  
603 with Markov chain Monte Carlo without likelihood. *Genetics* 182:1207–1218.
- 604 Wegmann, D., C. Leuenberger, S. Neuenschwander, and L. Excoffier. 2010. ABCtoolbox: a versatile toolkit  
605 for approximate Bayesian computations. *BMC Bioinformatics* 11:116.
- 606 White, T. A., S. E. Perkins, G. Heckel, and J. B. Searle. 2013. Adaptive evolution during an ongoing range  
607 expansion: the invasive bank vole (*Myodes glareolus*) in Ireland. *Mol. Ecol.* 22:2971–2985.
- 608 Zanetto, A., and A. Kremer. 1995. Geographical structure of gene diversity in *Quercus petraea* (Matt.) Liebl.  
609 I. Monolocus patterns of variation. *Heredity (Edinb)*. 75:506–517.
- 610
